# Supplementary material for: Study on guanidine-based task-specific ionic liquids as catalysts for direct aldol reactions without solvent
Source: Royal Society of Chemistry journal article supplement (doi:10.1039/b600277c), 2006-01-01
Supplement: b600277c.pdf [file b600277c.pdf]

## Study on Guanidine-based task-specific ionic liquids as catalysts for direct aldol reactions without solvent

Anlian Zhu, Tao Jiang\*, Buxing Han\*, Jun Huang, Jicheng Zhang, Xiumin Ma  
Center for Molecular Science, Institute of Chemistry, Chinese Academy of Sciences,  
Beijing 100080, China

E-mail: [Jiangt@iccas.ac.cn](mailto:Jiangt@iccas.ac.cn); [Hanbx@iccas.ac.cn](mailto:Hanbx@iccas.ac.cn); <mailto:Hanbx@iccas.ac.cn>

Fax: 86-10-62562821

<sup>1</sup>H NMR spectra were recorded as solutions in CDCl<sub>3</sub> at room temperature on a Bruker spectrometer using Me<sub>4</sub>Si as standard at 300 MHz.

**Compound 1** (Table 1, Entry 1). 2-(hydroxyl (4-nitrophenyl) methyl) cyclopentanone, <sup>1</sup>H-NMR (300 MHz, CDCl<sub>3</sub>; syn) (ppm): 1.55-2.76(m, 7H), 3.01(bs, 1H), 5.42(s, 1H), 7.73-8.32(m, 4H), <sup>1</sup>H-NMR (300 MHz, CDCl<sub>3</sub>; anti) (ppm): 1.55-2.76(m, 7H), 4.78(bs, 1H), 4.83(d, J=9.1 Hz, 1H), 7.73-8.32(m, 4H).

**Compound 2** (Table 1, Entry 7). 4-hydroxy-3-methyl-4- (4-nitrophenyl) butan-2-one, <sup>1</sup>H-NMR (300 MHz, CDCl<sub>3</sub>; syn) (ppm): 1.08(d, J=6 Hz, 3H), 2.26(s, 3H), 2.84(bs, 1H), 5.29(d, J=2.4 Hz, 1H), 7.52-8.25(m, 4H); <sup>1</sup>H-NMR (300 MHz, CDCl<sub>3</sub>; anti) (ppm): 1.03(d, J=6 Hz, 3H), 2.23(s, 3H), 2.91(bs, 1H), 4.87(d, J=7.9 Hz, 1H), 7.52-8.25(m, 4H).

**Compound 3** (Table 2, Entry 1). 4-hydroxy-4- (4- nitrophenyl) butan-2-one, <sup>1</sup>H-NMR (300 MHz, CDCl<sub>3</sub>) (ppm): 2.21 (s, 3H), 2.84 (m, 2H), 3.5 (bs 1H), 5.25 (m, 1H), 7.52 (d, J=6 Hz, 2H), 8.19 (d, J = 6.9 Hz, 2H).

**Compound 4** (Table 2, Entry 2). 2-(hydroxyl (4-nitrophenyl) methyl) cyclohexanone, <sup>1</sup>H-NMR (300 MHz, CDCl<sub>3</sub>; syn) (ppm): 1.30-2.61(m, 9H), 3.23(bs, 1H), 5.49(s, 1H), 7.51-8.23(m, 4H), <sup>1</sup>H-NMR (300 MHz, CDCl<sub>3</sub>; anti) (ppm): 1.30-2.61(m, 9H), 4.12(bs, 1H), 4.89(d, J=8.4 Hz, 1H), 7.51-8.23(m, 4H).

**Compound 5** (Table 2, Entry 3). 3-hydroxy-3- (4-nitrophenyl)-1-phenylpropan-1-one,

$^1\text{H-NMR}$  (300 MHz,  $\text{CDCl}_3$ ) (ppm): 3.38(m, 1H), 3.8(bs, 1H), 5.45(m, 1H), 7.47-8.42(m, 9H).

**Compound 6** (Table 2, Entry 4). 3-(hydroxyl (4-nitrophenyl) methyl) pentan-2-one,  $^1\text{H-NMR}$  (300 MHz,  $\text{CDCl}_3$ ; syn) (ppm): 0.82(t,  $J=6$  Hz, 3H), 1.68-1.75(m, 2H), 2.18(s, 1H), 2.79(m, 1H), 3.24(bs, 1H), 5.10(d,  $J=3$  Hz, 1H), 7.51-8.22(m, 4H),  $^1\text{H-NMR}$  (300 MHz,  $\text{CDCl}_3$ ; anti) (ppm): 0.90(t,  $J=6$  Hz, 3H), 1.48-1.55(m, 2H), 2.14(s, 3H), 2.84(m, 1H), 3.27(bs, 1H), 4.92(d,  $J=6$  Hz, 1H), 7.51-8.24(m, 4H).

**Compound 7** (Table 2, Entry 5). 4-hydroxy-3-methyl-4- (3-nitrophenyl) butan-2-one,  $^1\text{H-NMR}$  (300 MHz,  $\text{CDCl}_3$ ; syn) (ppm): 1.07(d,  $J=6.9$  Hz, 3H), 2.25(s, 3H), 2.88(m, 1H), 5.29(s, 1H), 7.52-8.23(m, 4H);  $^1\text{H-NMR}$  (300 MHz,  $\text{CDCl}_3$ ; anti) (ppm): 1.02(d,  $J=7.3$  Hz, 3H), 2.25(s, H), 2.97(m, 1H), 4.88(d,  $J=7.1$  Hz, 1H), 7.52-8.23(m, 4H).

**Compound 8** (Table 2, Entry 6). 4-hydroxy-3-methyl-4- (4-aldehydephenyl) butan-2-one,  $^1\text{H-NMR}$  (300 MHz,  $\text{CDCl}_3$ ; syn) (ppm): 1.02 (d,  $J=7.2$  Hz, 3H), 2.17(s, 3H), 2.80(m, 1H), 5.18(m, 1H), 7.45-7.82(m, 4H), 9.94(s, 1H);  $^1\text{H-NMR}$  (300 MHz,  $\text{CDCl}_3$ ; anti) (ppm): 0.92(d,  $J=7.2$  Hz, 3H), 2.17(s, 3H), 2.86(m, 1H), 4.79(m, 1H), 7.45-7.82(m, 4H), 9.94(s, 1H).

**Compound 9** (Table 2, Entry 7). 2-((benzol [*d*] [1,3] dioxol-6-yl)(hydroxy) methyl)-cyclopentanone,  $^1\text{H-NMR}$  (300 MHz,  $\text{CDCl}_3$ ; syn) (ppm): 1.52-2.44(m, 7H), 4.62(d,  $J=2.0$  Hz, 1H), 5.97(s, 2H), 6.78-6.89(m, 3H);  $^1\text{H-NMR}$  (300 MHz,  $\text{CDCl}_3$ ; anti) (ppm): 1.52-2.44(m, 7H), 4.62(d,  $J=9.2$  Hz, 1H), 5.97(s, 2H), 6.78-6.89(m, 3H).
